# Supplementary material for: Broncho-alveolar inflammation in COVID-19 patients: a correlation with clinical outcome
Source: BMC Pulm Med. 2020 Nov 16;20:301. doi: 10.1186/s12890-020-01343-z (PMC7668012; doi:10.1186/s12890-020-01343-z)
Supplement: Supplementary file 1 — Additional file 1: Figure S1. Severely cytopathic cells in BAL sample of ICU patient. (a) Squared area is enlarged in (b) that shows isolated viral particles in the cytoplasms; (c) shows a similar severe cytopathic cell: the squared area is enlarged in (d) with isolated viral particles. (e) BAL cells immunoreacting with anti-spike antibodies were variably represented in BAL samples (10x), including (f) ciliated epithelia, 20x. Scale bar = 2 μm and 200 nm. Figure S2. (a-b) Electron micrograph showing a ciliated cytopathic cell with single viral particles (enlarged in b) and vesicles containing smaller viral particles (upper white arrow in b). Scale bar = 1 μm and 200 nm. Figure S3. The figure shows infected VERO E6 cells at (a) 48 and (b-f) 72 h from infection with SARS-CoV-2. (a) severely cytopathic cell (lower) in close contact with a non-cytopathic cell (upper). Scale bar = 2 μm. (b) Extensively damaged cell with multiple viral arrays. Scale bar = 1 μm. (c) Viral particles with variable morphology, with and without spikes in cytoplasmic vesicles (➔) and free in the cytoplasm (squared area). Scale bar = 200 nm. (d) the extensive immunostaining with anti-spike antibodies in infected VERO E6 cells, 20x. (e) Spiked viral particles in cytoplasmic vesicles. Scale bar = 200 nm. (f) Spiked viral particles free in the cytoplasm. Scale bar = 100 nm. Table S1. Correlation analysis of entire BAL collected between cell populations and cytokines. Table S2. Correlation analysis between cytokines quantified in BALs overall. Figure S4. IL6, 8 and 10 trends in two representative ICU patients. (a) survivor (treated with anti-viral + corticosteroids) and (b) non-survivor (treated only with tocilizumab). Figure S5. Correlation between IL6 quantified in plasma vs. IL6 quantified in BAL of the same patients sampled at the same day. r = Sparman coefficient; p = p value. [file 12890_2020_1343_MOESM1_ESM.docx]

Supplementary material of:

**Broncho-alveolar inflammation in COVID-19 patients: a correlation with clinical outcome**

Pandolfi Laura1*°, Fossali Tommaso2*, Frangipane Vanessa1, Bozzini Sara1, Morosini Monica1, D’Amato Maura1, Lettieri Sara3,Urtis Mario4, Di Toro Alessandro4,Saracino Laura5, Percivalle Elena6, Tomaselli Stefano5, Cavagna Lorenzo7, Cova Emanuela8, Mojoli Francesco9, Bergomi Paola2, Ottolina Davide2, Lilleri Daniele10, Corsico Angelo Guido3, Arbustini Eloisa4, Colombo Riccardo2 and Meloni Federica3


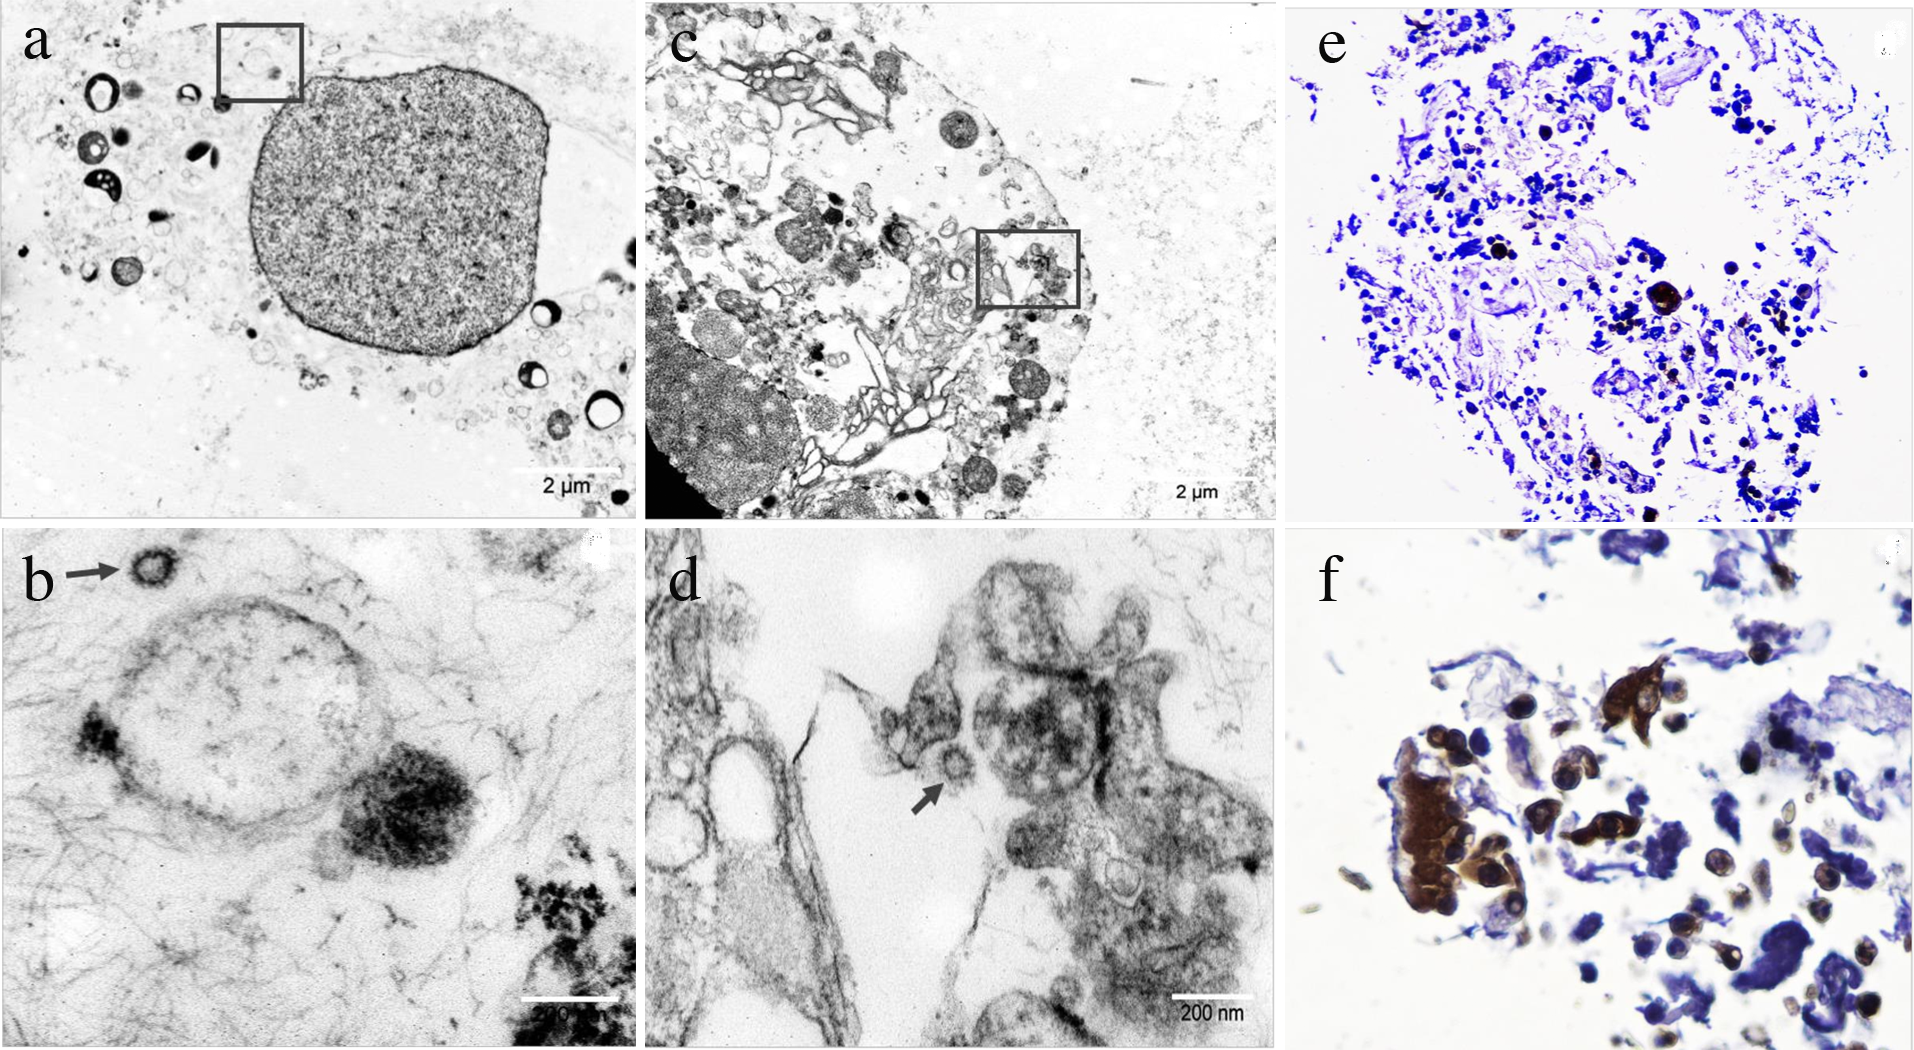


Figure S1. Severely cytopathic cells in BAL sample of ICU patient. (a) Squared area is enlarged in (b) that shows isolated viral particles in the cytoplasms; (c) shows a similar severe cytopathic cell: the squared area is enlarged in (d) with isolated viral particles. (e) BAL cells immunoreacting with anti-spike antibodies were variably represented in BAL samples (10x), including (f) ciliated epithelia, 20x. Scale bar = 2 µm and 200 nm.


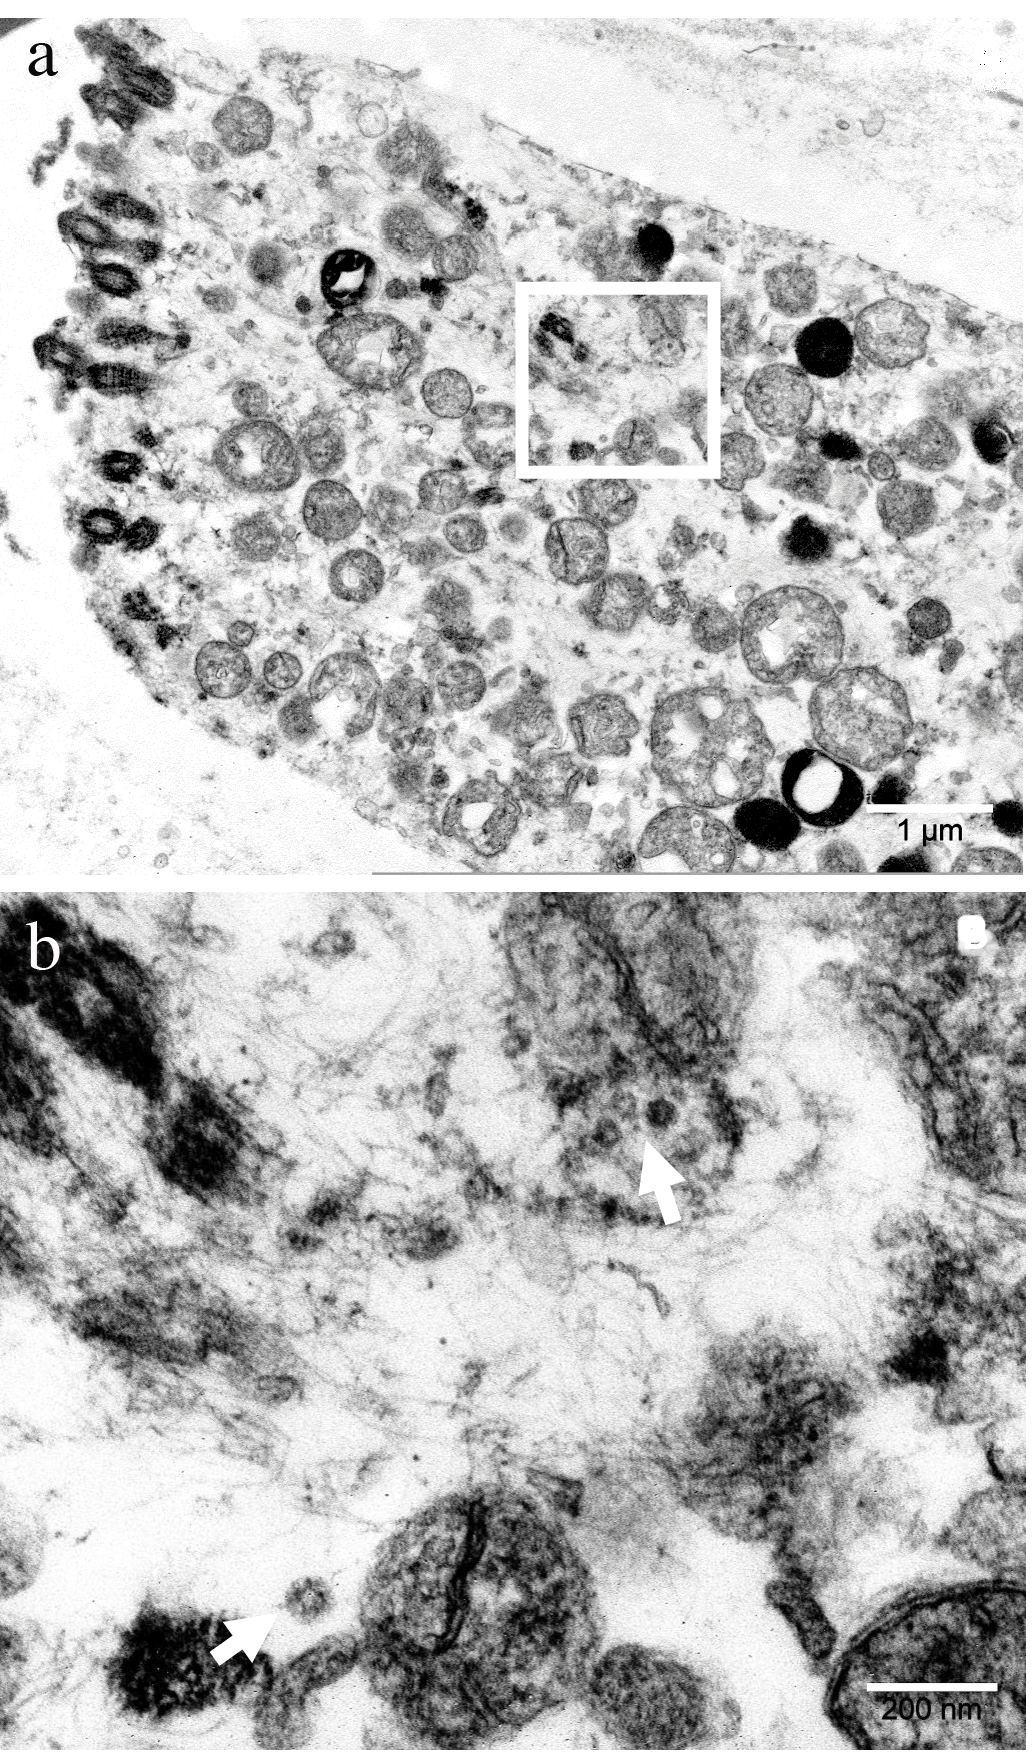


Figure S2. (a-b) Electron micrograph showing a ciliated cytopathic cell with single viral particles (enlarged in b) and vesicles containing smaller viral particles (upper white arrow in b). Scale bar = 1 µm and 200 nm


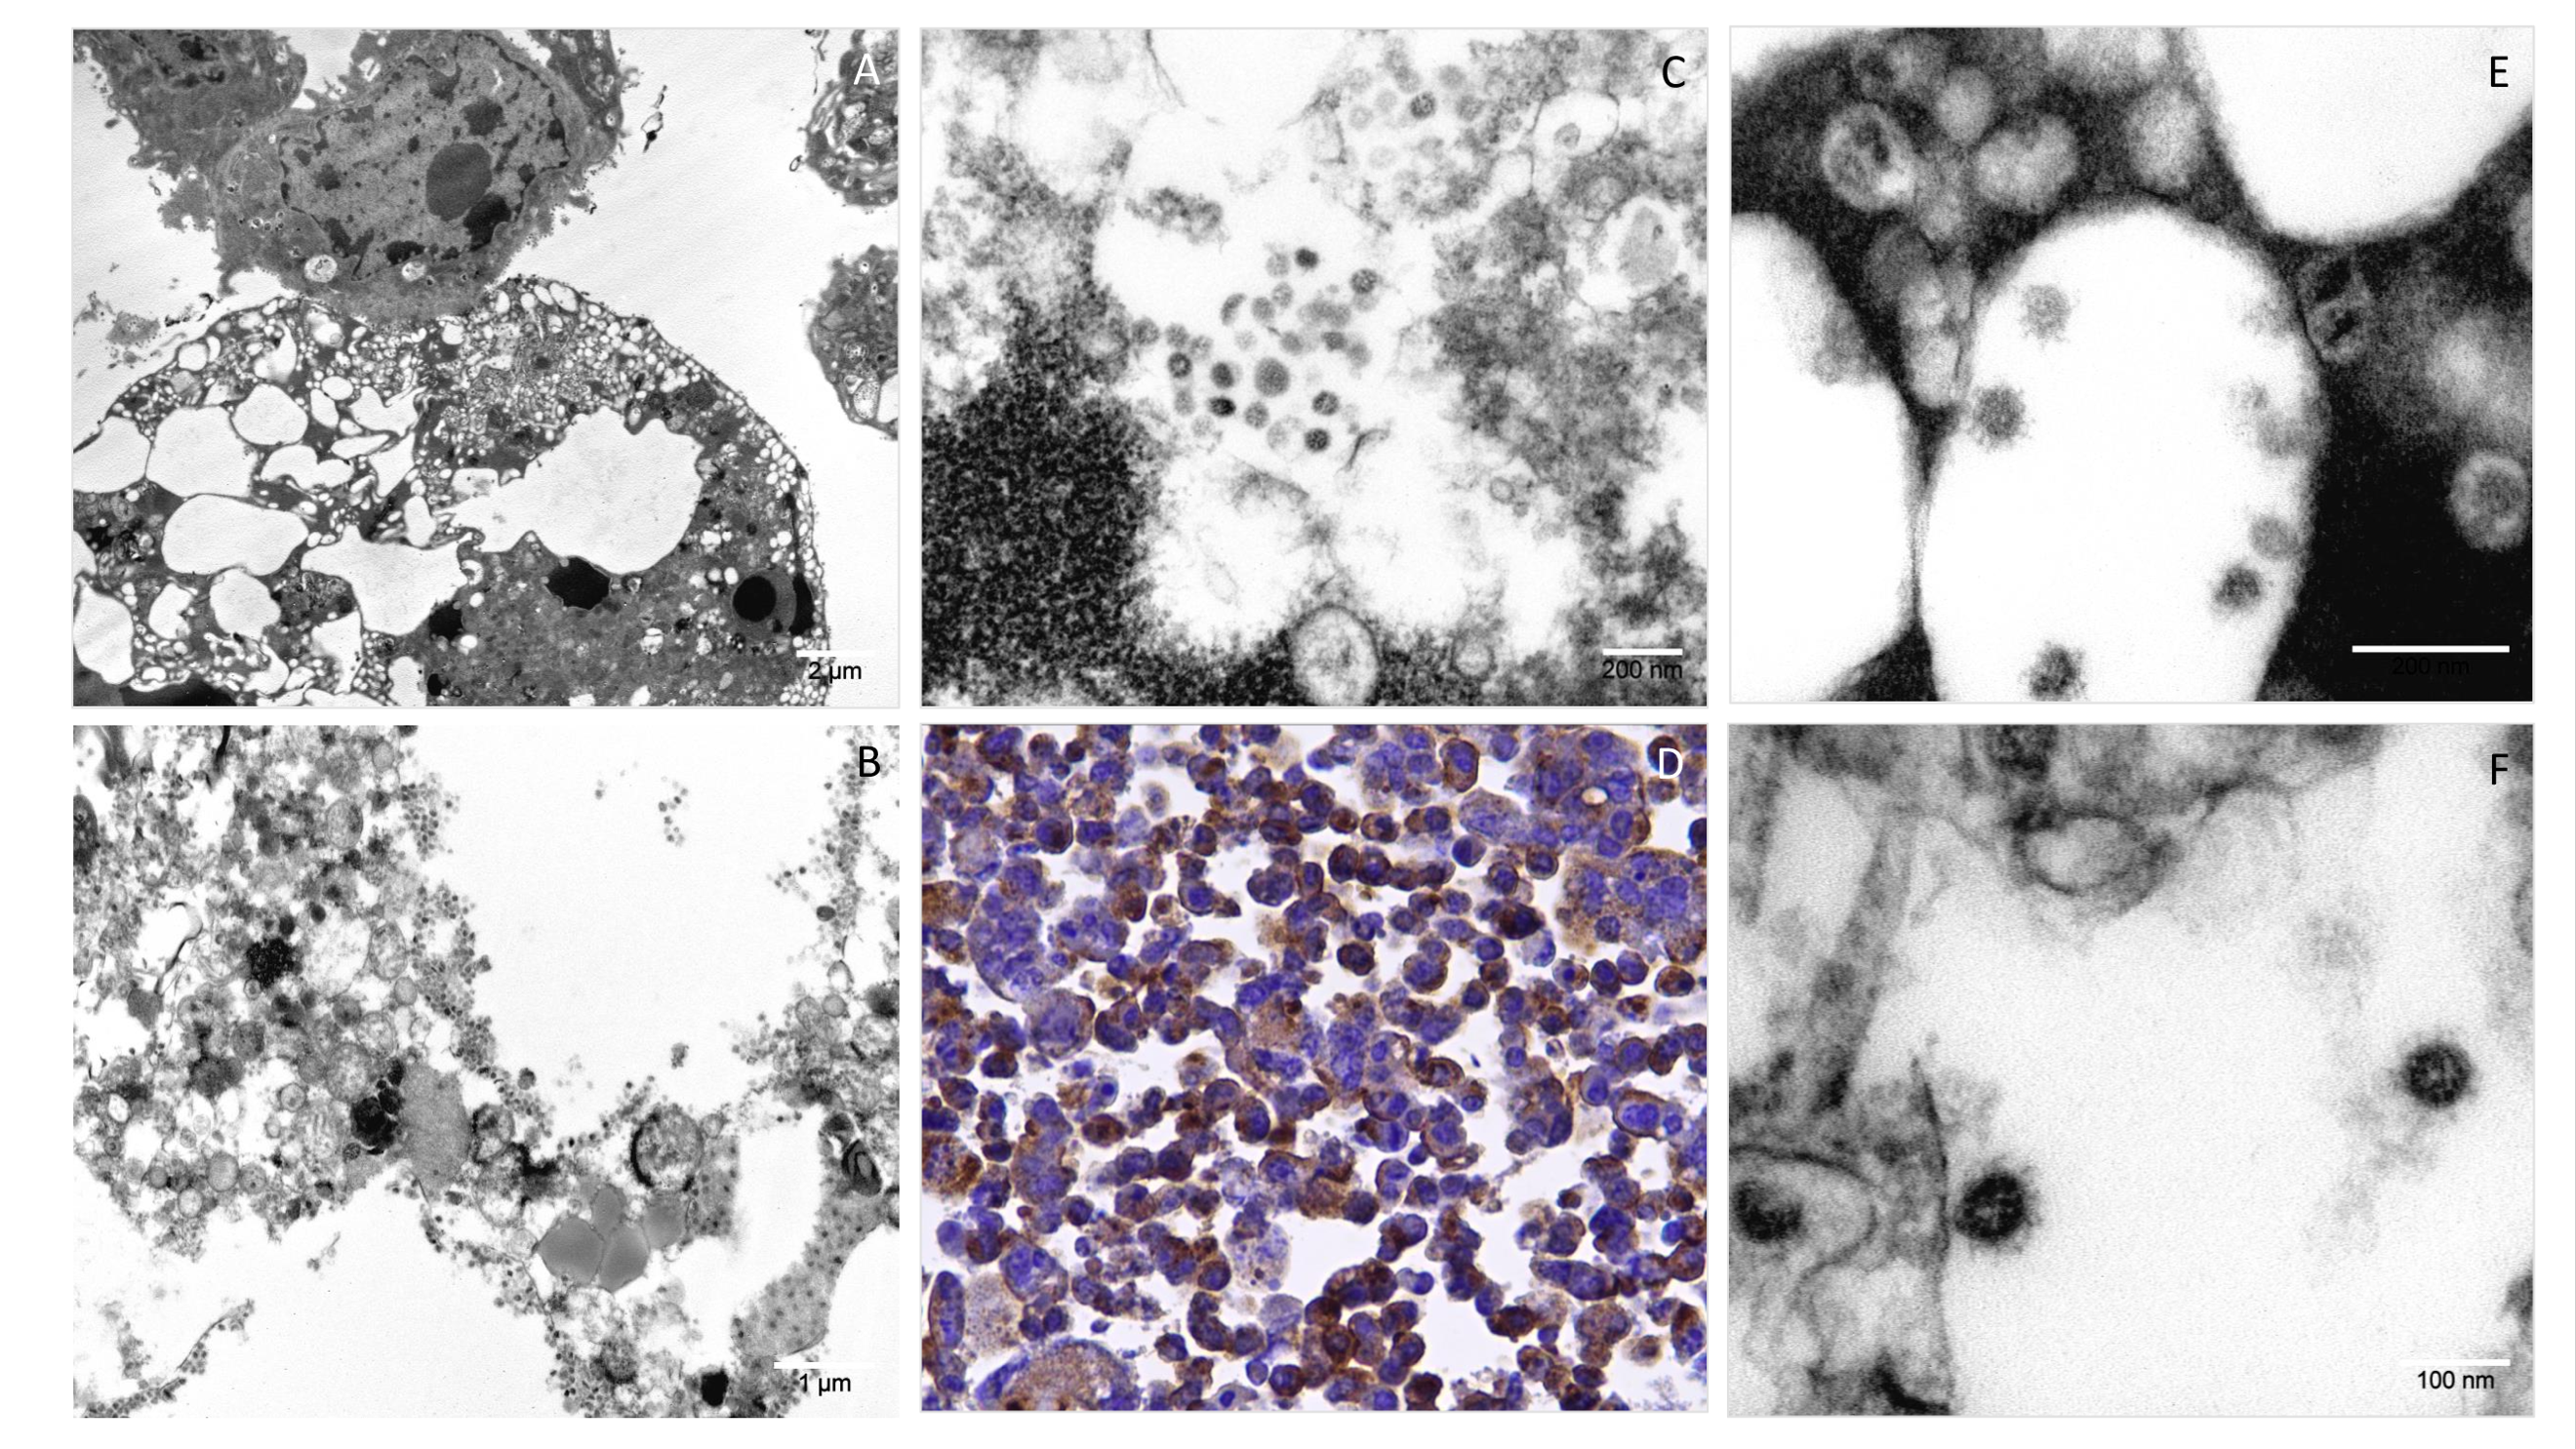


Figure S3. The figure shows infected VERO E6 cells at (a) 48 and (b-f) 72 hours from infection with SARS-CoV-2. (a) severely cytopathic cell (lower) in close contact with a non-cytopathic cell (upper). Scale bar = 2 µm. (b) Extensively damaged cell with multiple viral arrays. Scale bar = 1 µm. (c) Viral particles with variable morphology, with and without spikes in cytoplasmic vesicles (🡪) and free in the cytoplasm (squared area). Scale bar = 200 nm. (d) the extensive immunostaining with anti-spike antibodies in infected VERO E6 cells, 20x. (e) Spiked viral particles in cytoplasmic vesicles. Scale bar = 200 nm. (f) Spiked viral particles free in the cytoplasm. Scale bar = 100 nm.

Table S1. Correlation analysis of entire BAL collected between cell populations and cytokines.

|  | IL6 | | IL8 | | IL10 | |
| --- | --- | --- | --- | --- | --- | --- |
|  | *r* | *p* | *r* | *p* | *r* | *p* |
| MACROPHAGES (%) | -0.4843 | 0.0090 | -0.6555 | 0.0002 | 0.09727 | 0.6224 |
| NEUTROPHILS (%) | 0.3746 | 0.0495 | 0.7921 | < 0.0001 | -0.1518 | 0.4407 |
| LYMPHOCYTES (%) | -0.02908 | 0.8832 | -0.5366 | 0.0032 | 0.2411 | 0.2165 |

r = Spearman coefficient; p = p value

Table S2. Correlation analysis between cytokines quantified in BALs overall.

|  | IL6 | | IL8 | | IL10 | |
| --- | --- | --- | --- | --- | --- | --- |
|  | *r* | *P* | *r* | *p* | *r* | *p* |
| IL6 | - | - | 0.458 | 0.003 | -0.234 | 0.140 |
| IL8 | 0.458 | 0.003 | - |  | -0.448 | 0.003 |
| IL10 | -0.234 | 0.140 | -0.448 | 0.003 |  |  |

r = Spearman coefficient; p = p value


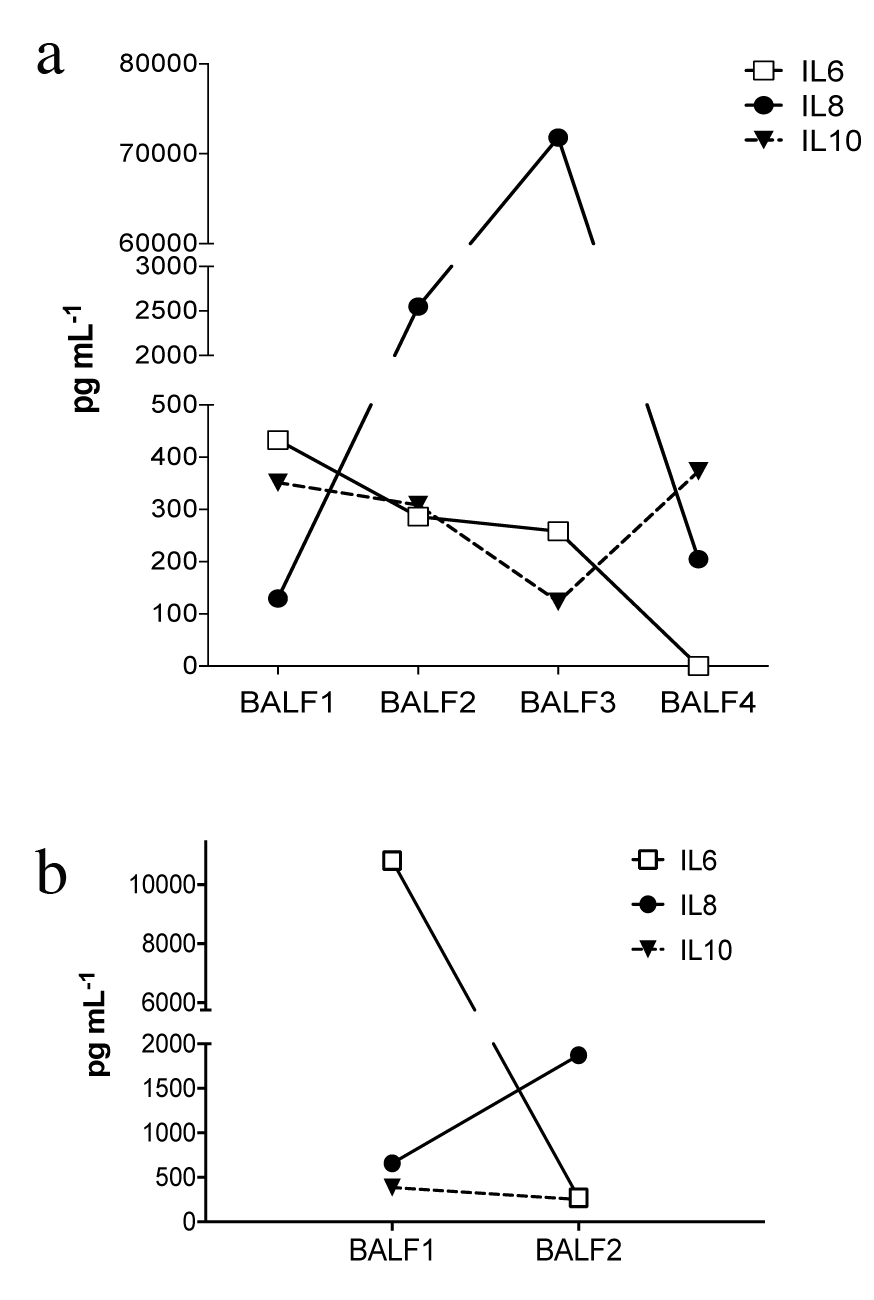


Figure S4. IL6, 8 and 10 trends in two representative ICU patients. (a) survivor (treated with anti-viral + corticosteroids) and (b) non-survivor (treated only with tocilizumab).


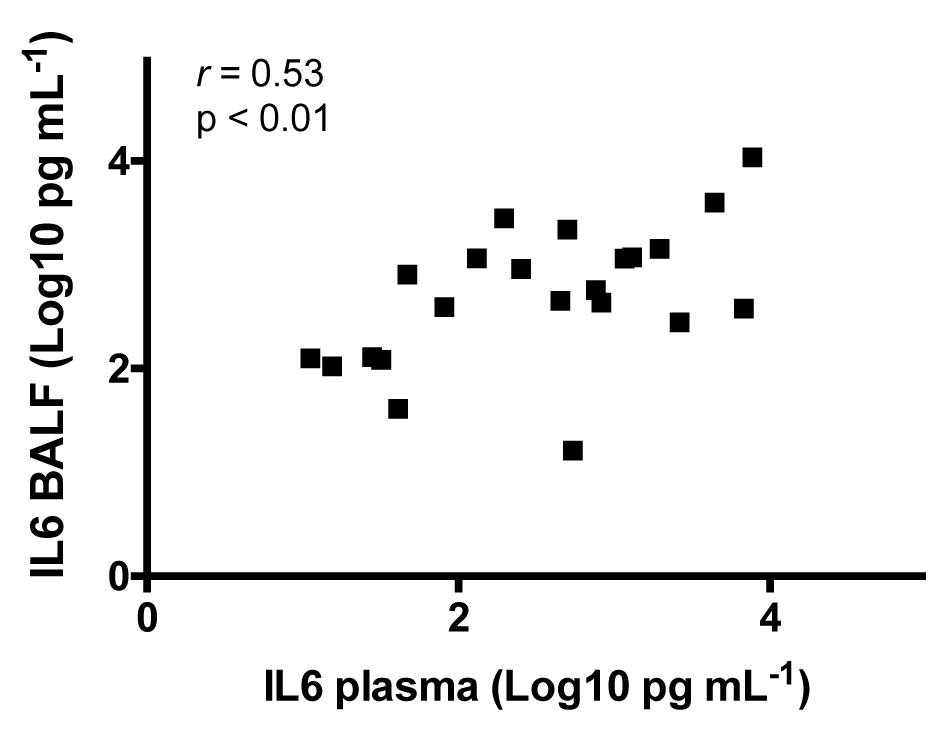


Figure S5. Correlation between IL6 quantified in plasma vs. IL6 quantified in BAL of the same patients sampled at the same day. r = Sparman coefficient; p = p value.
